# Supplementary material
Source: ML conference proceedings conference paper supplement (https://proceedings.neurips.cc/paper_files/paper/2022/hash/004bed4e186fdd7ebb73aad6e97c2332-Abstract.html)
Supplement: Supplementary file 1 [file 004bed4e186fdd7ebb73aad6e97c2332-Supplemental-Datasets_and_Benchmarks.zip]

Archive with 12 entries (11 files):
- sup/appendix.pdf
- sup/bench/
- sup/bench/analysis.ipynb
- sup/bench/hpo.py
- sup/bench/main.py
- sup/bench/net.py
- sup/bench/qclient.py
- sup/bench/qprotocol.py
- sup/bench/qserver.py
- sup/bench/readbench.py
- sup/bench/split.py
- sup/bench/worker.py
